# Supplementary material
Source: publisher figshare collection journal article supplement (https://tandf.figshare.com/ndownloader/files/14758346)
Supplement: Supplementary file 1 [file 14758346]

**Supporting Information**

A new stable porous Pr-organic framework constructed by multi-iodine-substituted aromatic polycarboxylates: Synthesis, characterization and selective adsorption of dyes

YING SUN, FENG YING BAI, XUE MIN WANG, YU WANG, LI XIAN SUN and YONG HENG XING*

**Supplementary Index**

[1. IR spectra S3](#__RefHeading___Toc22351_WPSOffice_Level1)

[2. UV-Vis spectra S4](#__RefHeading___Toc10571_WPSOffice_Level1)

[3. PXRD spectra S5](#__RefHeading___Toc7903_WPSOffice_Level1)

[4. TGA spectra S6](#__RefHeading___Toc16440_WPSOffice_Level1)

[5. Structure of compound **1** S7](#__RefHeading___Toc18402_WPSOffice_Level1)

[6. UV-Vis calibration curves for organic dyes S8](#__RefHeading___Toc22517_WPSOffice_Level1)

[7. Atomic force microscope scan test S11](#__RefHeading___Toc14067_WPSOffice_Level1)

8. EDX test S13

9. Label thermal ellipsoid S14

**1. IR spectra**

(a)

##

(b)

Figure S1. (a) The IR spectrum of ligand of H3TIBTC. (b) The IR spectrum of ligand of compound **1**.

**2. UV-Vis spectra**

(a)

(b)

Figure S2. (a) The UV spectrum of ligand of H3TIBTC. (b) The UV spectrum of ligand of compound **1**.

**3. PXRD spectra**

Figure S3. PXRD of compound **1**.

**4. TGA spectra**


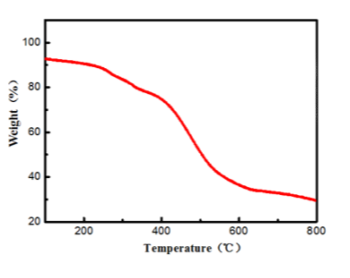


Figure S4. TG of compound **1**.

**5. Structure of compound 1**

**
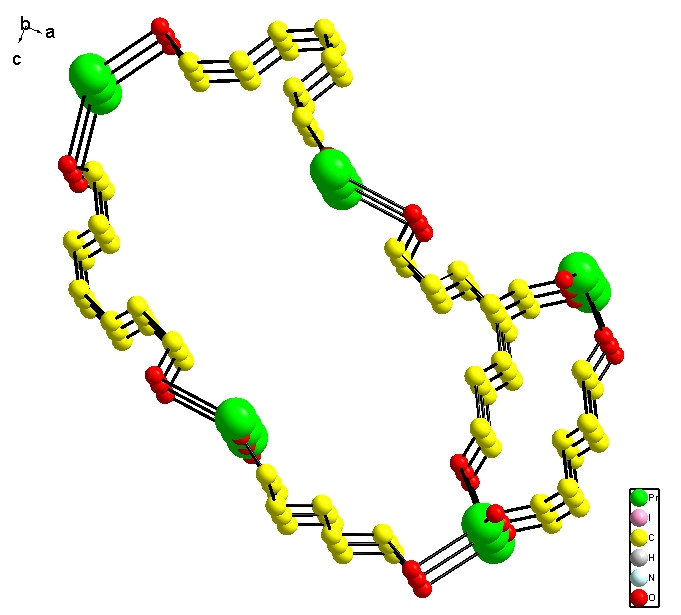
**

**17.43Å**

**10.07Å**

(a)

**
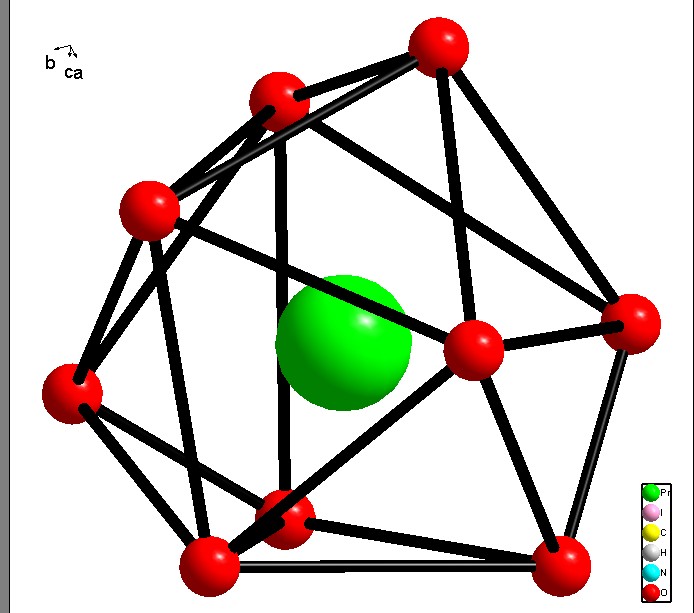
**

(b)

**
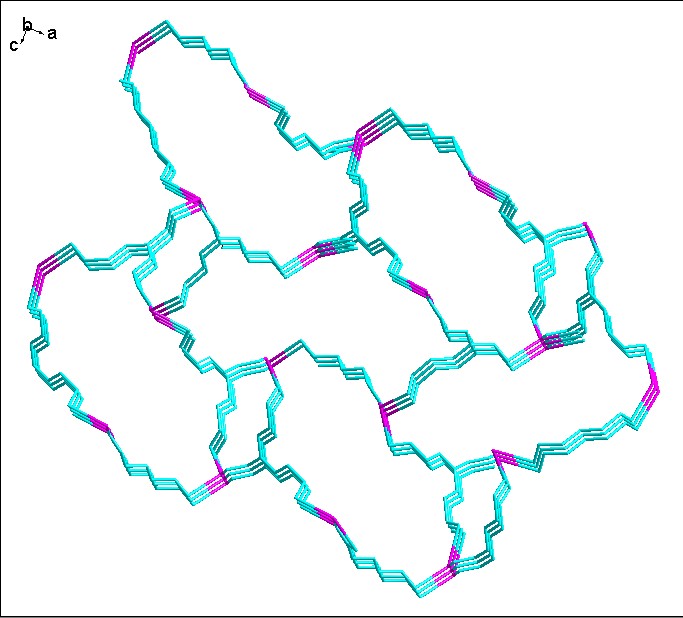
**

(c)

Figure S5. (a) The pore structure of compound **1**. (b) PrO9 three cap triangular prismatic space configuration. (c) Simplified topology structure.

**6. UV-Vis calibration curves for organic dyes**


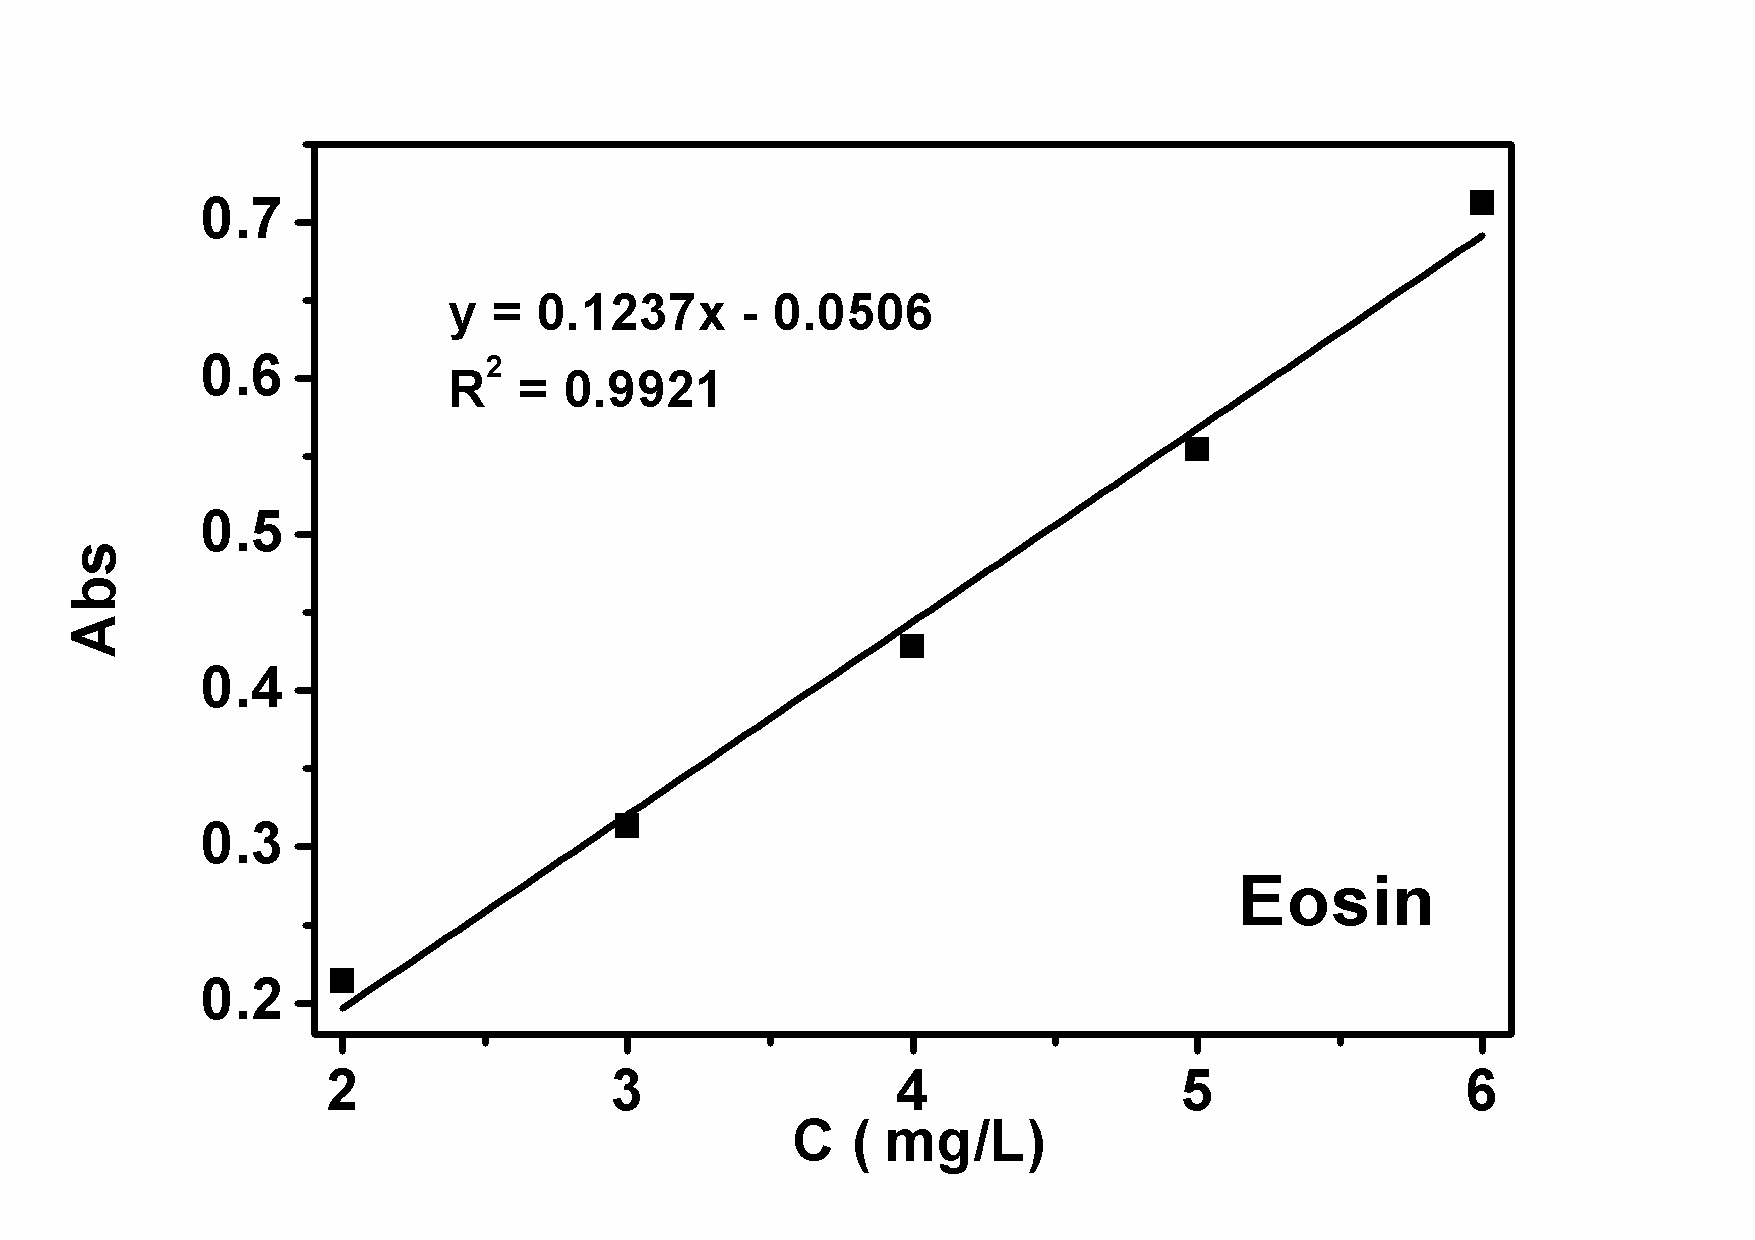


(a)


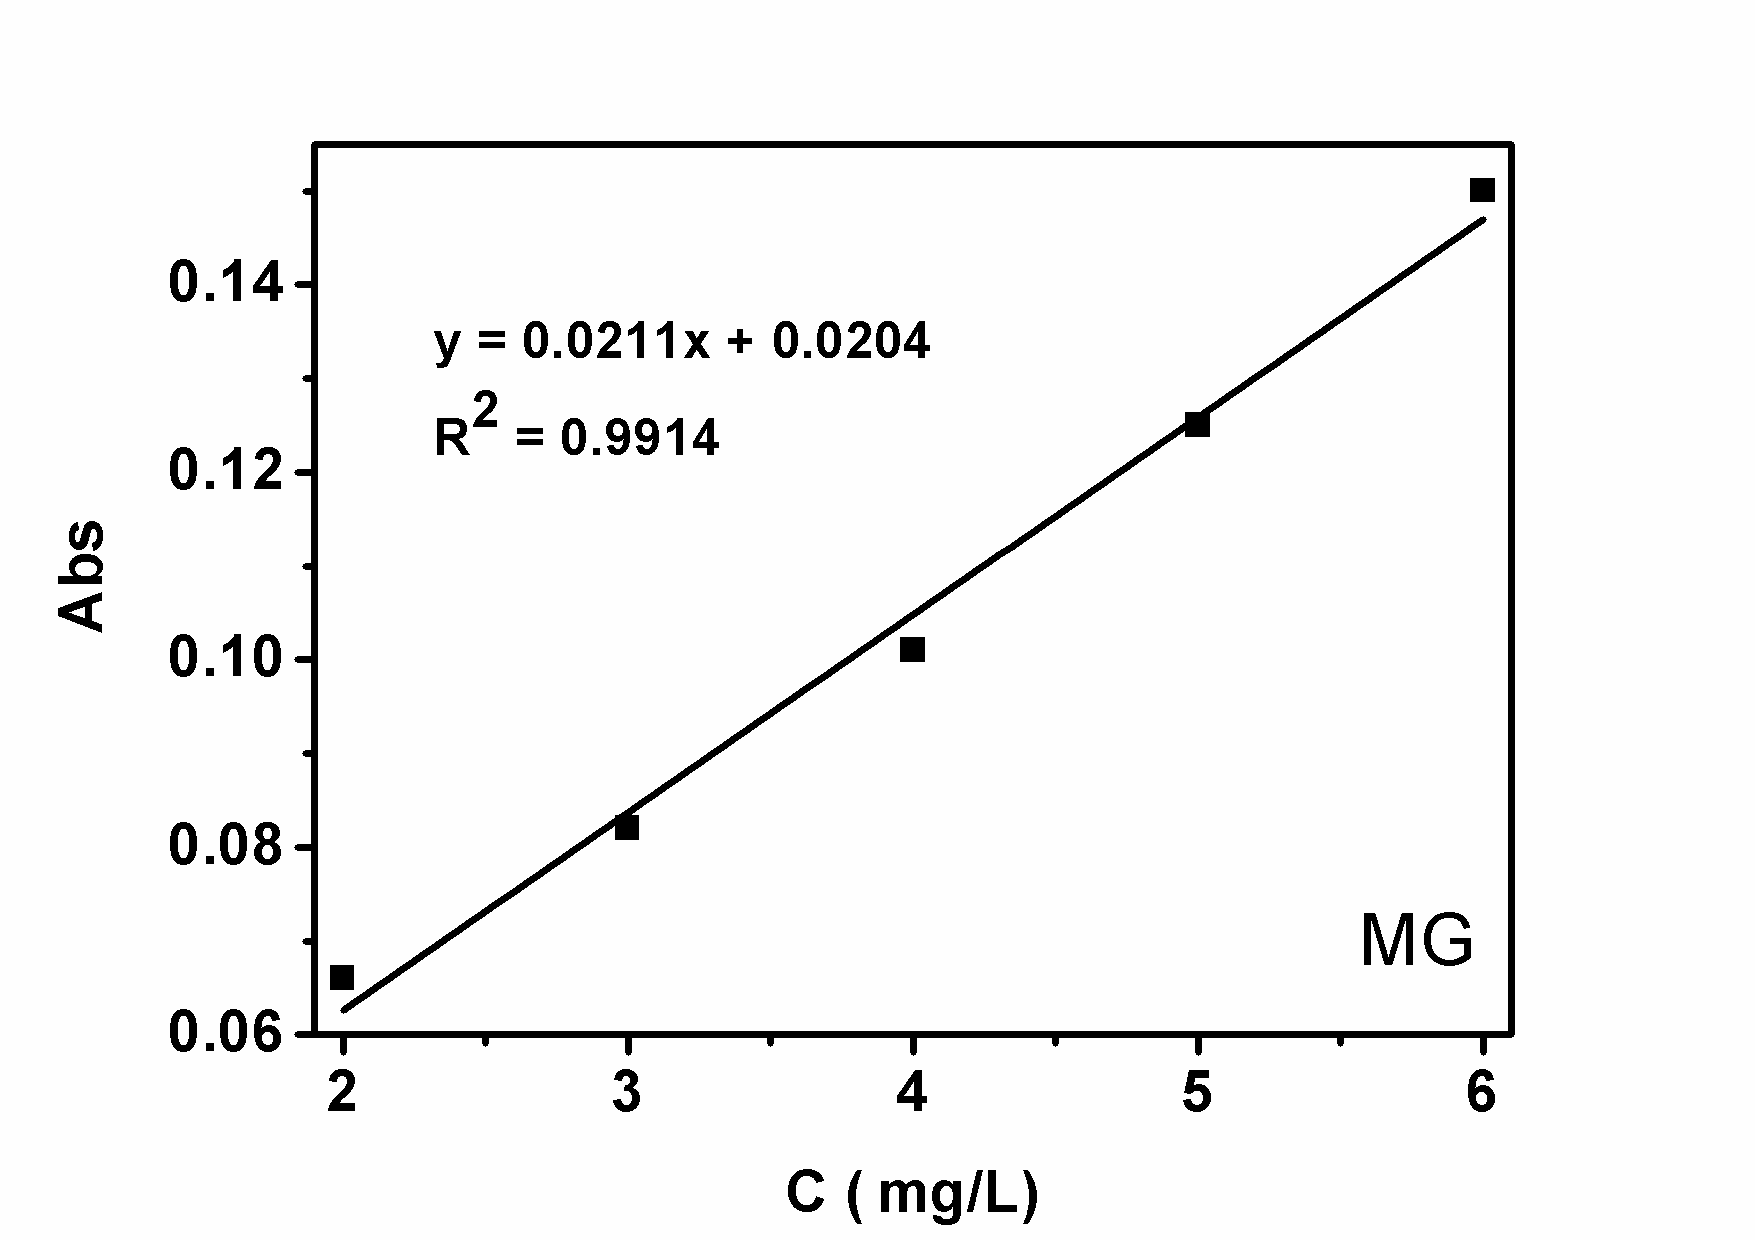


(b)

(c)

(d)


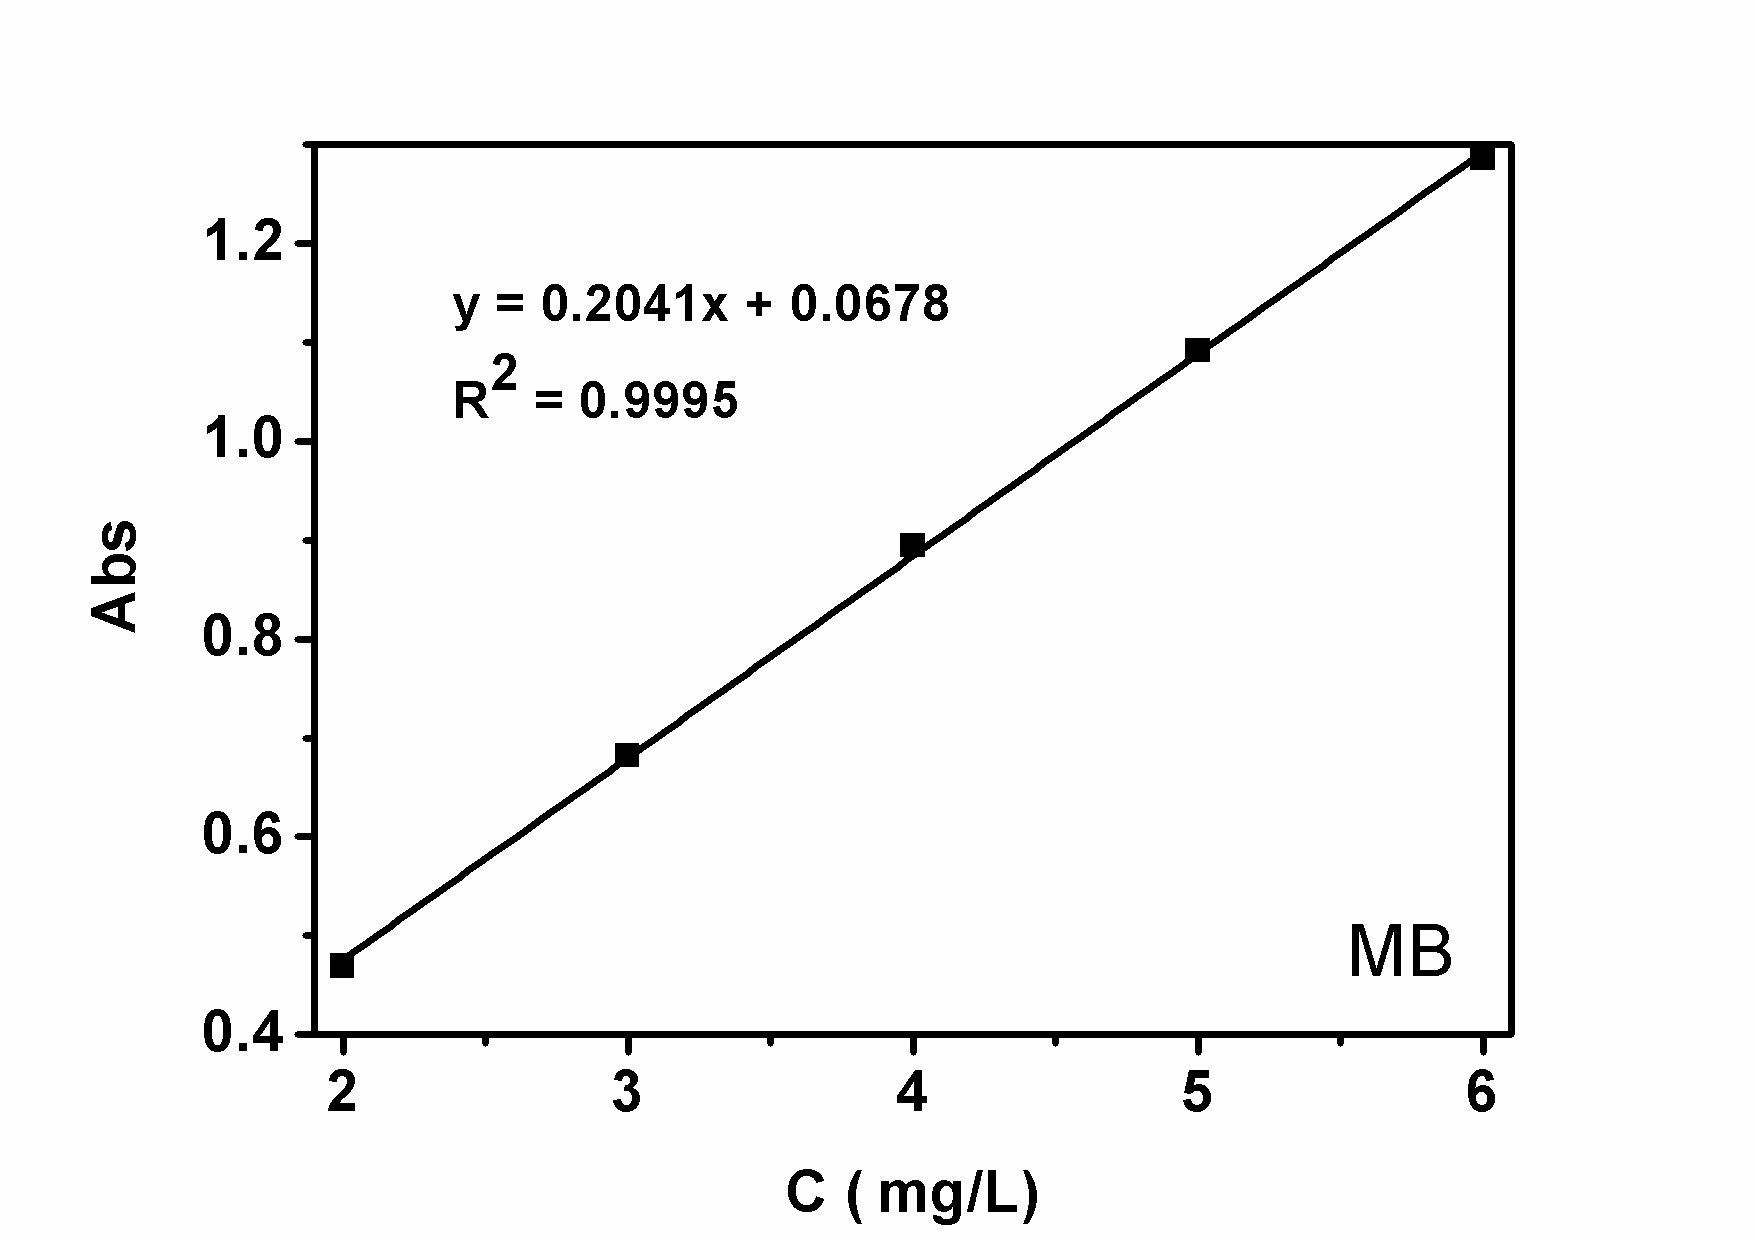


(e)

(f)

Figure S6. UV-Vis calibration curves for dyes: (a) eosin; (b) MG; (c) OG; (d) CBB R-250; (e) MB; (f) crystal violet.

**7. Atomic force microscope scan test**

**
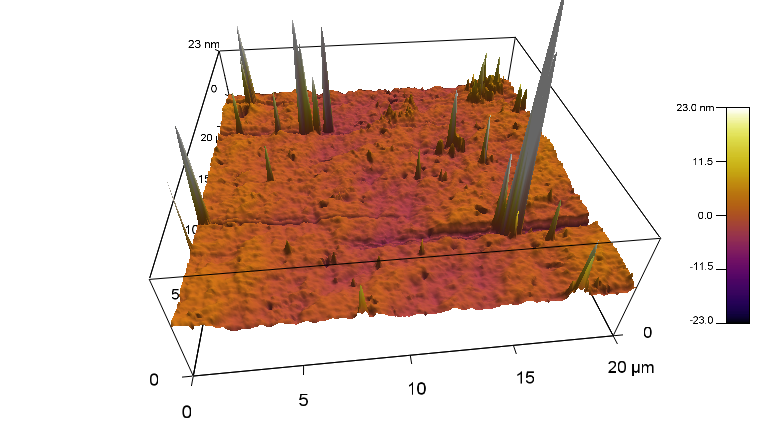
**

(a)

**
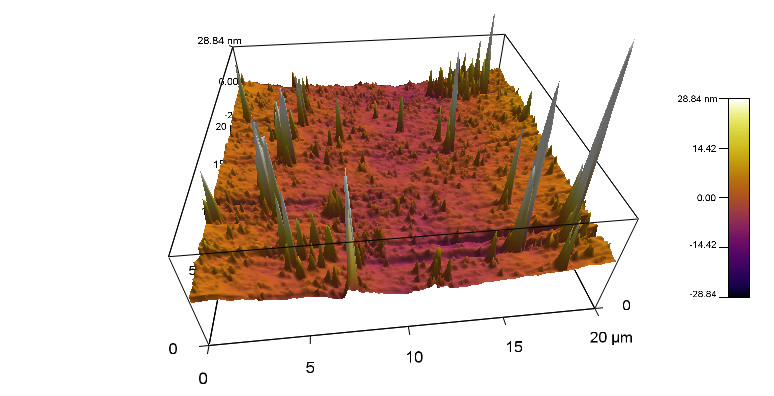
**

(b)

**
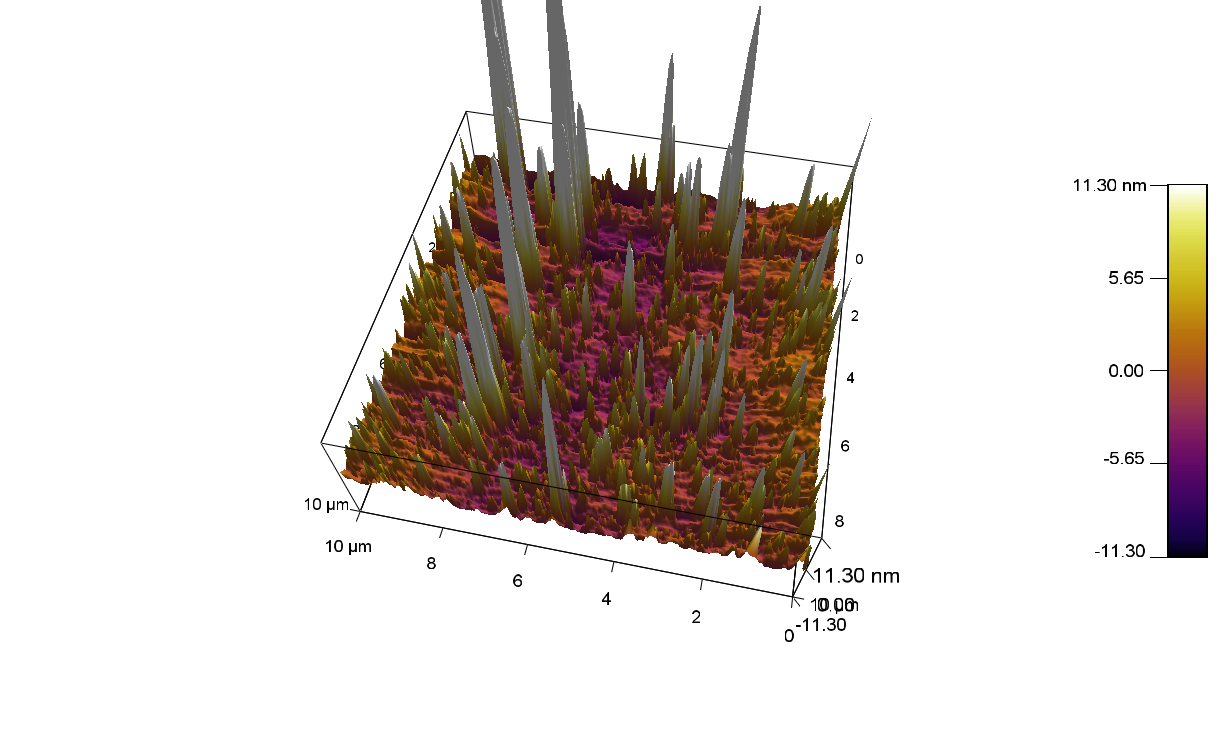
**

(c)

Figure S7. (a) A perspective view of an unadsorbed dye solution. (b) A perspective view of a portion of the dye adsorbed. (c) A perspective view of the adsorbed dye after three cycles.

**8. EDX test**


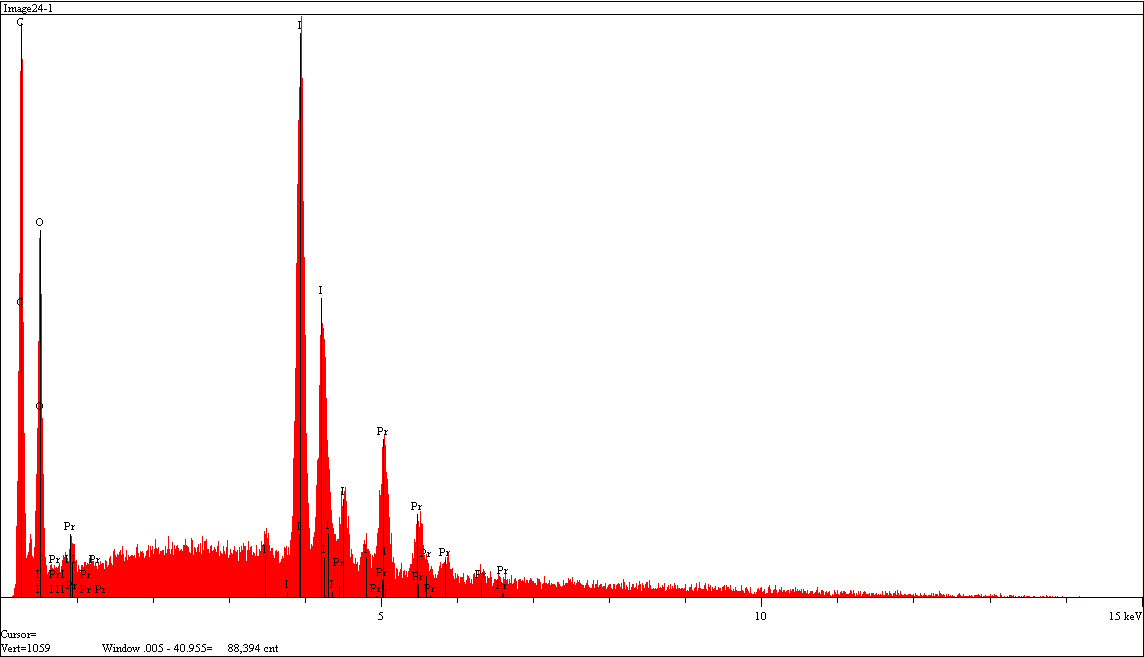


(a)


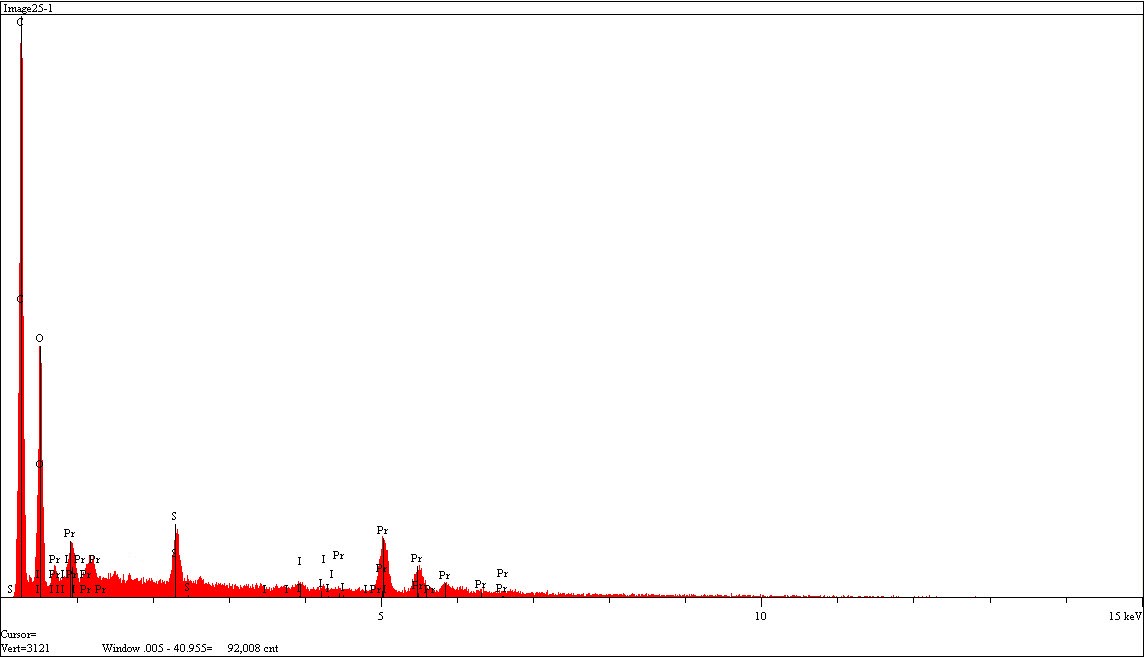


(b)

Figure S8. (a) EDX diagram before adsorption. (b) Adsorbed EDX diagram.

**9. Label thermal ellipsoid**


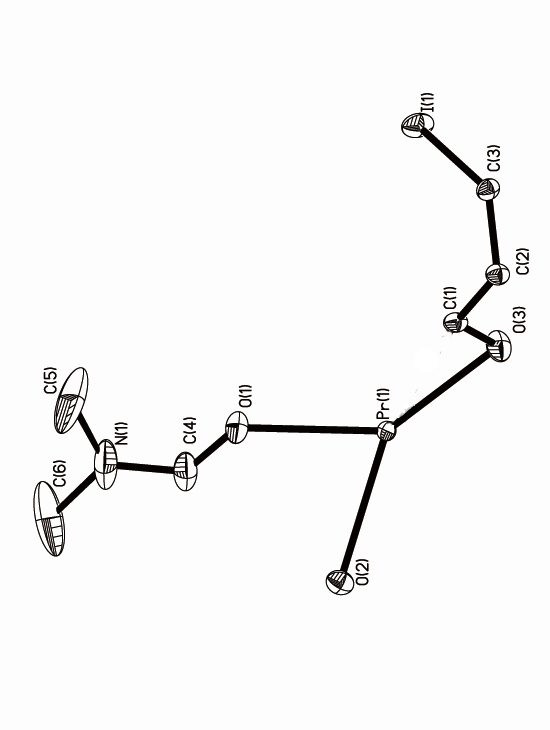


Figure S9. A label thermal ellipsoid plot of the asymmetric unit of **1**.
